# Supplementary material for: Transformable cis–trans isomerism of ruthenium(ii) complexes with photoactivated anticancer activity
Source: Royal Society of Chemistry journal article supplement (doi:10.1039/d4qi02665a), 2025-01-01
Supplement: d4qi02665a2.pdf [file d4qi02665a2.pdf]

## Transformable *Cis-trans* Isomerism of Ruthenium (II) Complexes with Photoactivated Anticancer Activity

### Original Data of Western Blotting

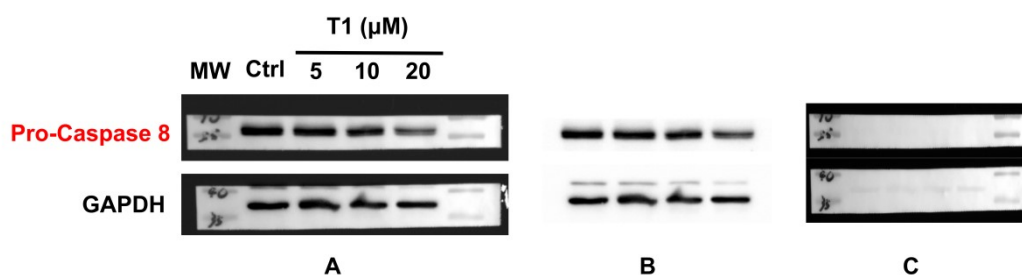

Figure S1. Pro-Caspase 8

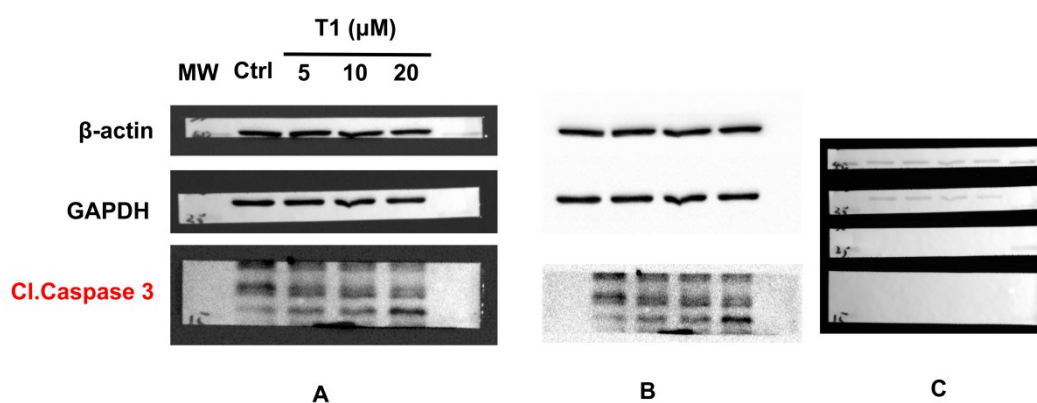

Figure S2. Cl.Caspase 3

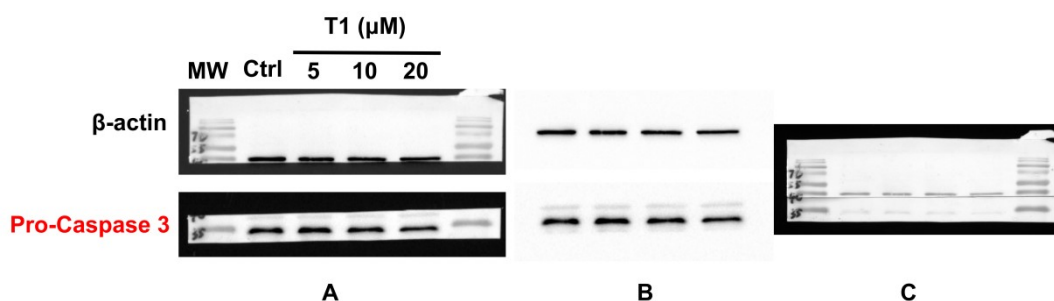

Figure S3. Pro-Caspase 3

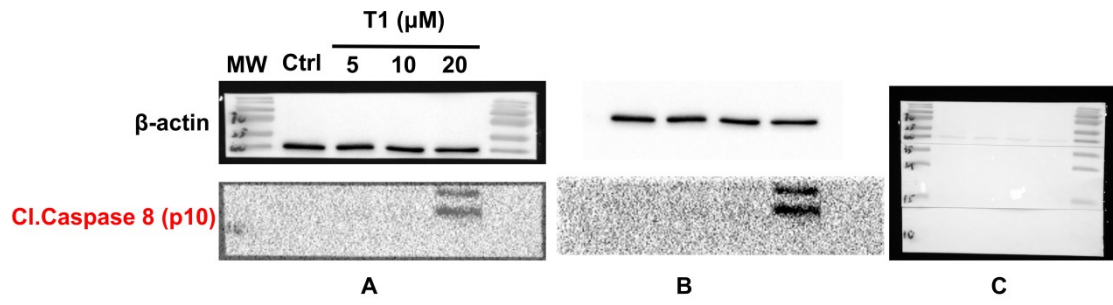

Figure S4. Cl.Caspase 8(p10)

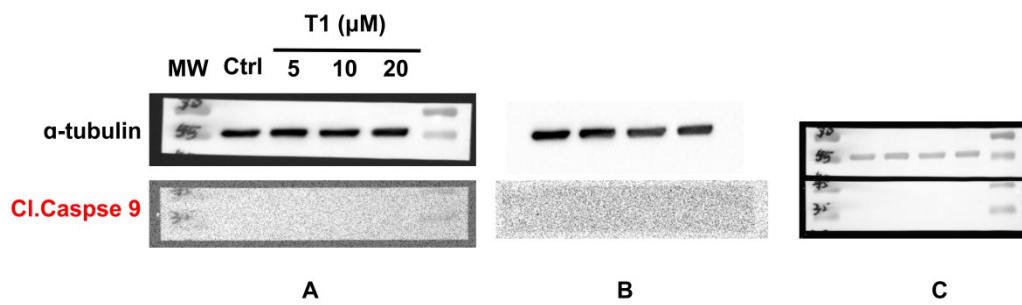

Figure S5. Cl.Caspase 8(p10)

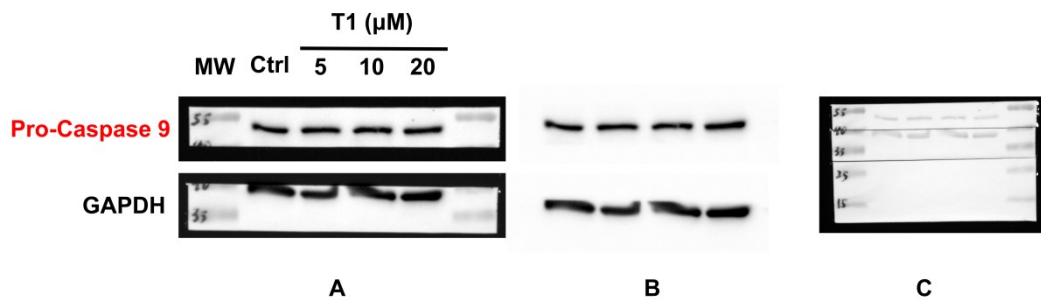

Figure S6. Pro-Caspase 9

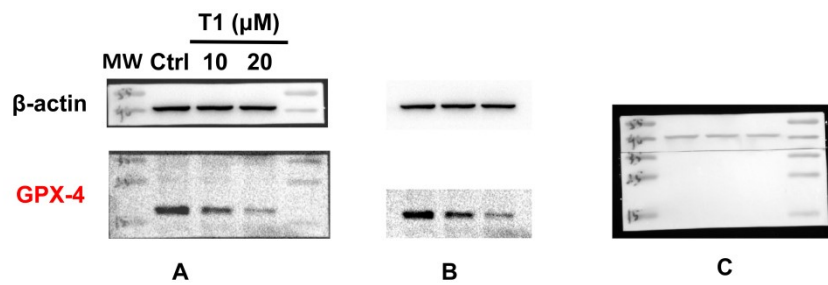

Figure S7. GPX 4

**Supplementary Figure.** Unprocessed original membranes of Western blotting shown in **Figure 2**, **Figure 3** in manuscript and **Figure S34** in Supporting Information. MW: molecular weight ladder. According to the molecular weight of protein, the shown blots are cropped from different parts of the same gel, as explicit by using clear delineation with dividing lines and white space. Different internal reference proteins ( $\beta$ -actin, GAPDH and  $\alpha$ -Tubulin) are selected according to the molecular weight of the target proteins which they can be separated.
